# Supplementary material for: RIP140 and LCoR expression in gastrointestinal cancers
Source: PubMed Central journal article supplement (PMC5762313; doi:10.18632/oncotarget.22686), 2017-11-25
Supplement: oncotarget-08-111161-s001.pdf [file oncotarget-08-111161-s001.pdf]

## RIP140 and LCoR expression in gastrointestinal cancers

### SUPPLEMENTARY MATERIALS

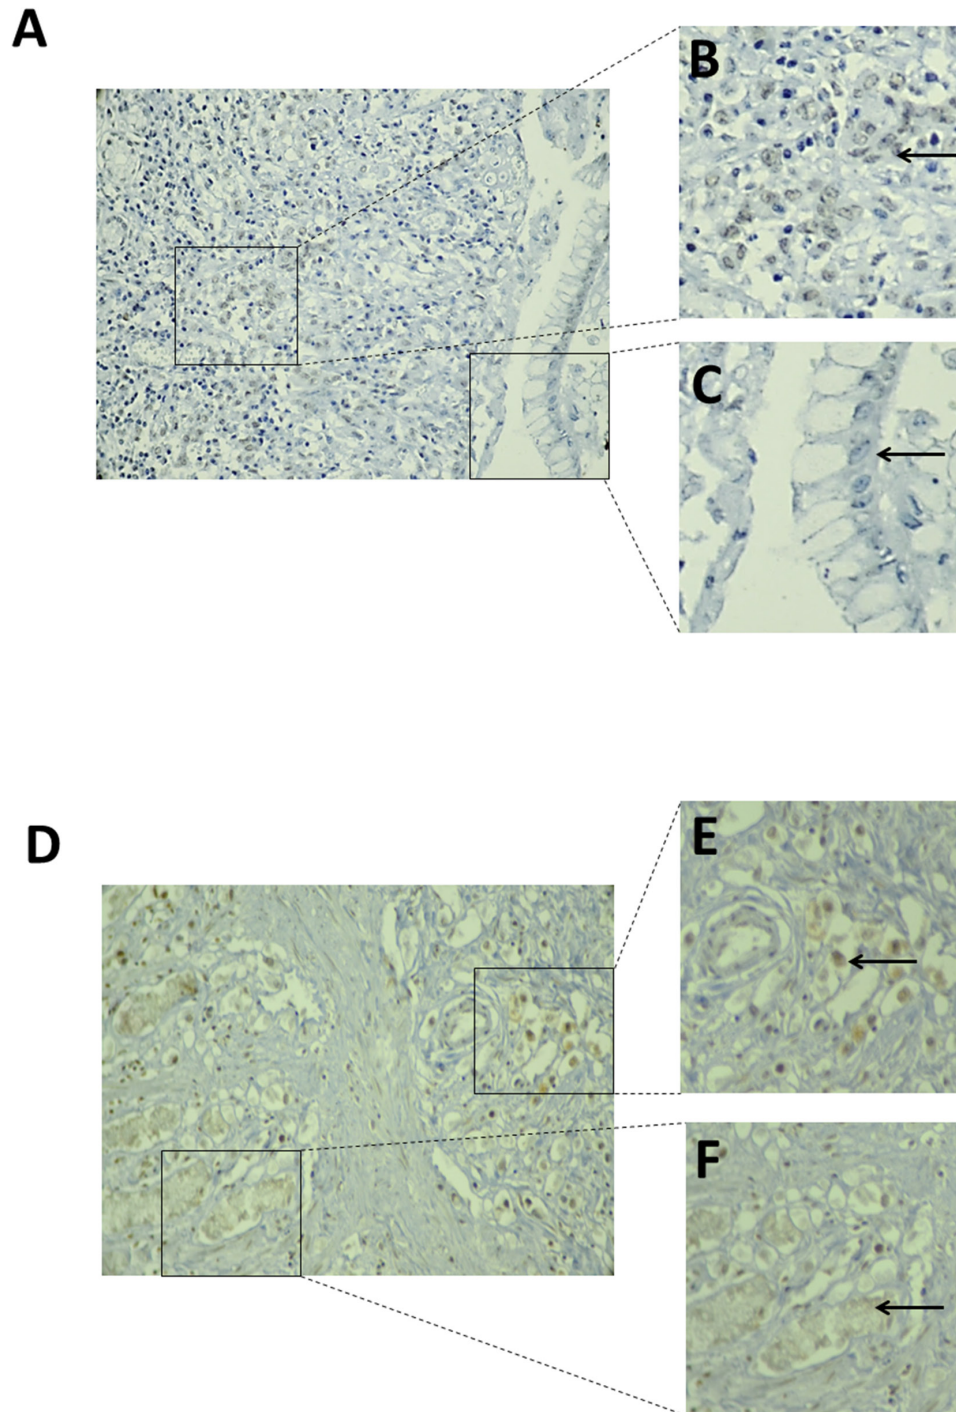

**Supplementary Figure 1: Increased expression of RIP140 and LCoR in gastric cancer.** Immunostaining of RIP140 (A) and LCoR (D) expression in tumoral gastric cancer (B and E) in comparison to normal mucosa (C and F).

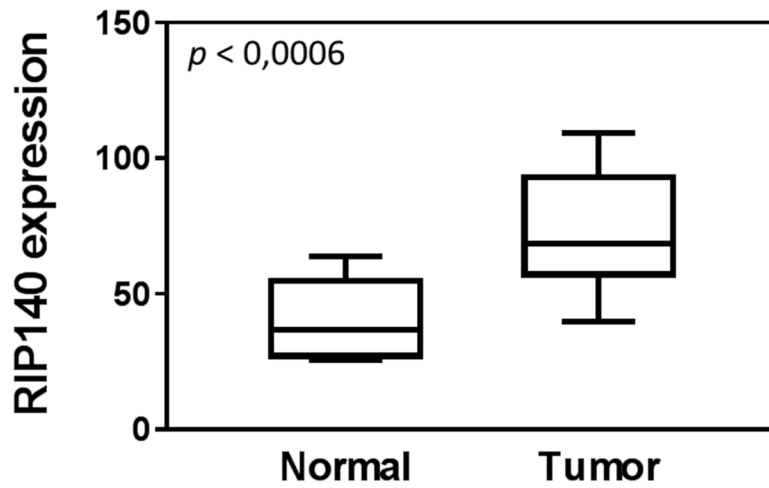

**Supplementary Figure 2: Higher levels of RIP140 mRNA in GC.** Reanalysis of the GDS1210 transcriptomic data showing the up-regulation of RIP140 expression in gastric cancer compared to normal mucosa. Correlations were performed using the nonparametric Mann–Whitney *U* test. Boxplots show the median and interquartile range (box) and the 10-90 percentiles (whiskers).

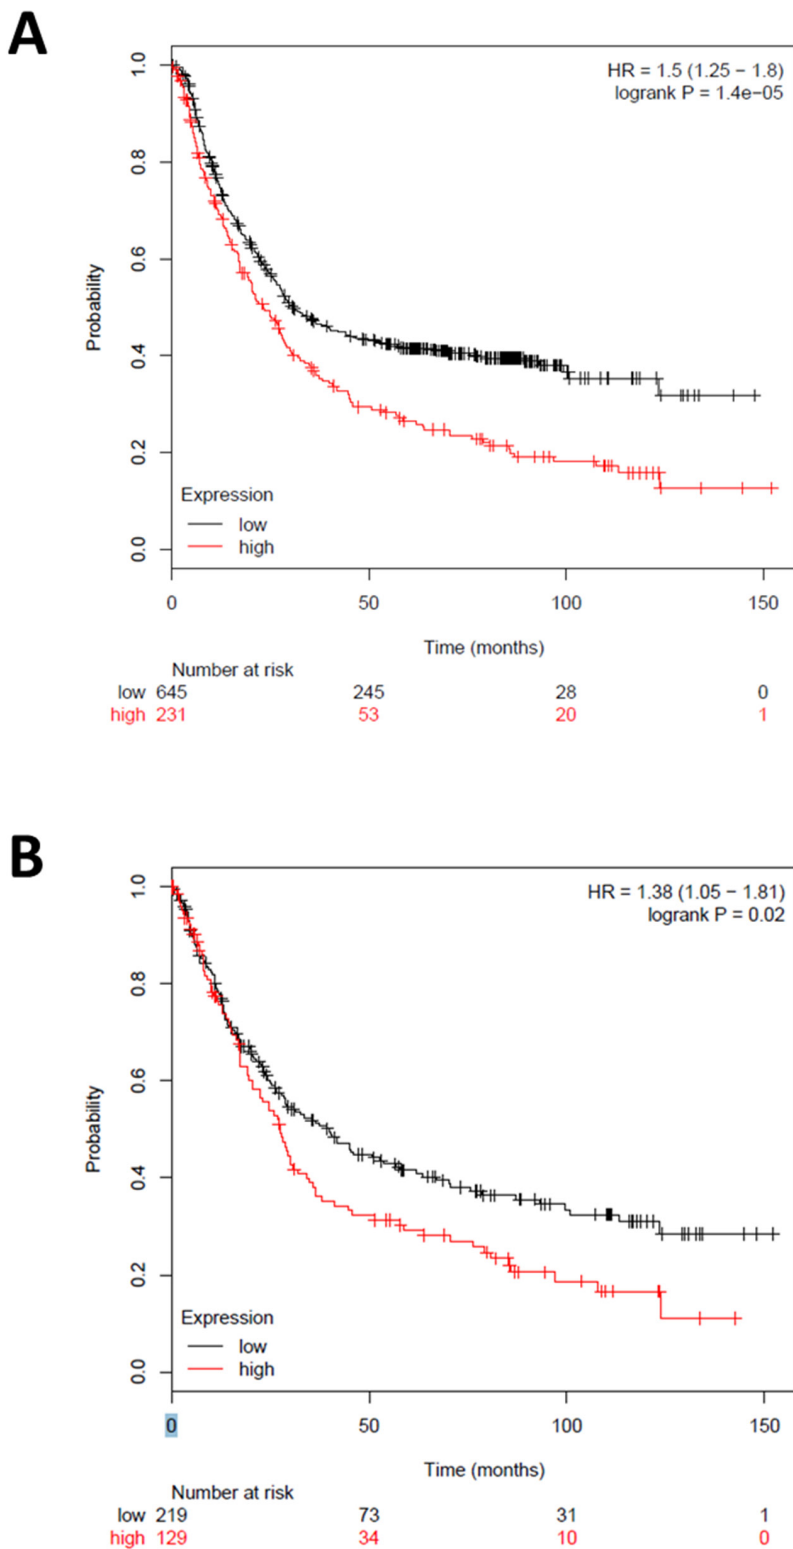

**Supplementary Figure 3: Correlation of RIP140 and LCoR mRNA expression with OS of patients with GC.** The Kaplan Meier plotter [41] was used to analyze the correlation of RIP140 and LCoR gene expression (using median cut-off) with overall survival of patients with GC. **(A)** Kaplan Meier curve for the RIP140/NRIP1 probeset 202600\_s\_at in 876 patients. **(B)** Kaplan Meier curve for the LCoR probeset 226520\_at in 348 patients. The hazard ratio with 95% confidence intervals and log-rank p-value were calculated.
